# Supplementary material for: 3D plotting of highly uniform Sr5(PO4)2SiO4 bioceramic scaffolds for bone tissue engineering
Source: Royal Society of Chemistry journal article supplement (doi:10.1039/c6tb01692h), 2016-01-01
Supplement: c6tb01692h1.pdf [file c6tb01692h1.pdf]

**Supplementary documents:**

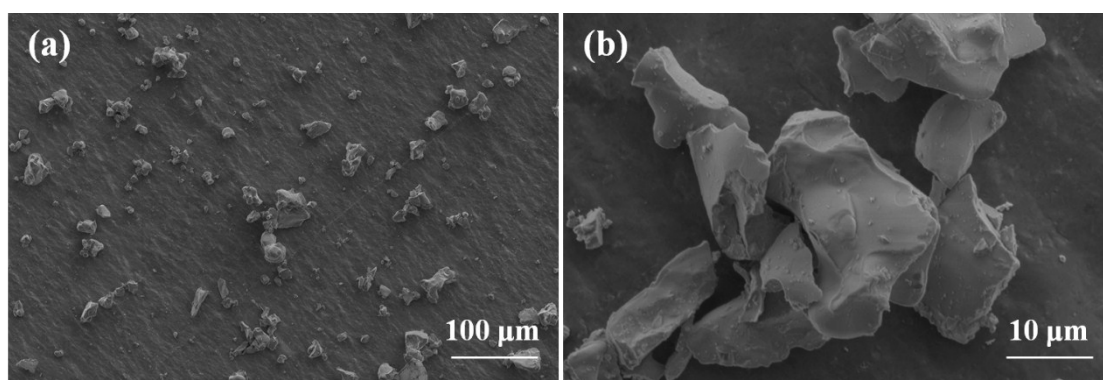

Supplementary Fig. 1 SEM analysis for the synthesized SPS powders.

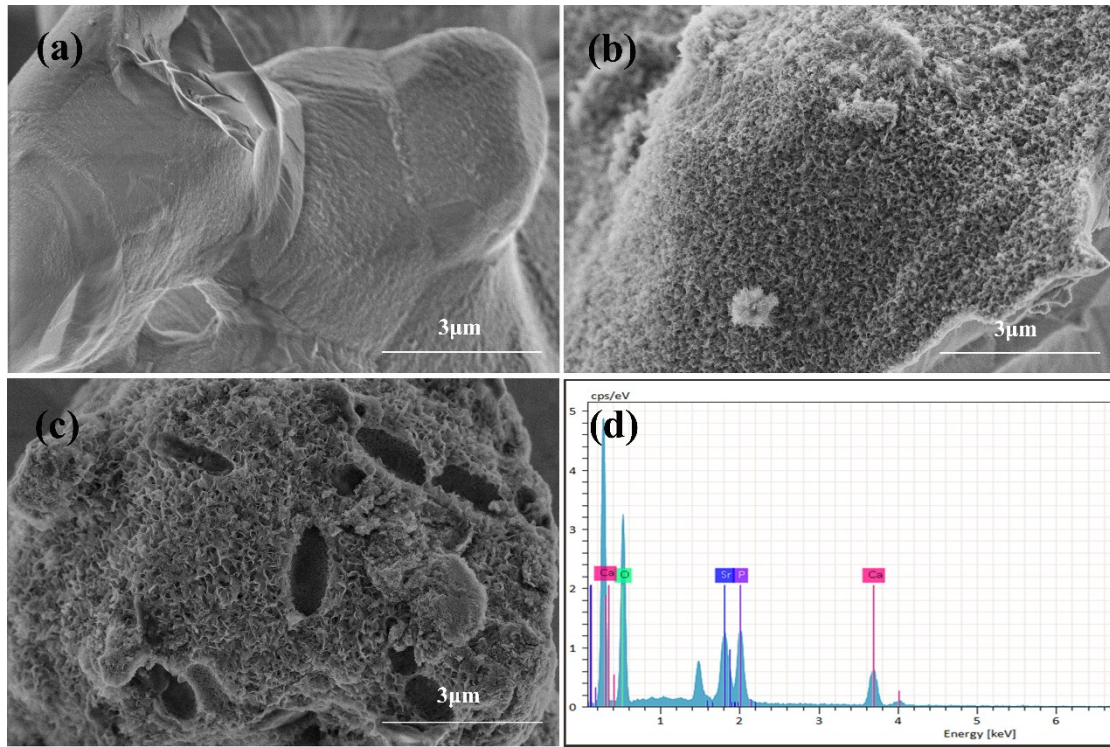

Supplementary Fig. 2 SEM images and EDS analysis for SPS powders soaked in SBF for 0 (a), 1 (b) and 7 days (c, d).

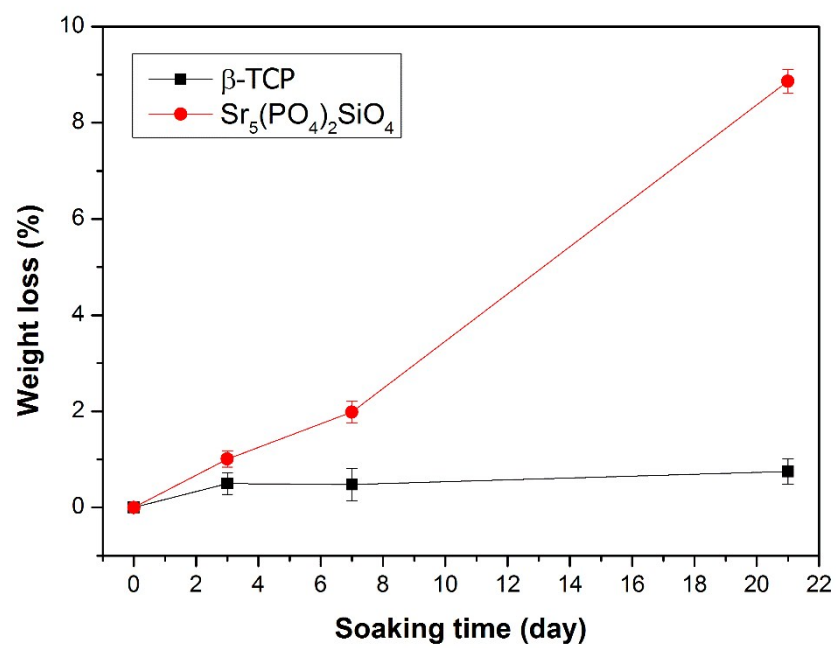

Supplementary Fig. 3 The weight loss of  $\beta$ -TCP and SPS scaffolds in Tris-HCl solution.
